# Supplementary material for: Predictive Factors for Humoral Response After 2-dose SARS-CoV-2 Vaccine in Solid Organ Transplant Patients
Source: PubMed Central journal article supplement — Transplant Direct. 2021 Dec 23;8(1):e1248. doi: 10.1097/TXD.0000000000001248 (PMC8710345; doi:10.1097/txd.0000000000001248), 2021-12-23
Supplement: txd-8-e1248-s001.pdf [file txd-8-e1248-s001.pdf]

**Supplementary Table 1:** Characteristics of solid organ transplant recipients with and without a 4 weeks follow-up after 2 doses mRNA-based vaccination.

|                                                                   | SOT recipients with 4 weeks anti-SARS-CoV2 antibodies monitoring post-vaccination (N=393) | SOT recipients without 4 weeks anti-SARS-CoV2 antibodies monitoring post-vaccination (N=631) |
|-------------------------------------------------------------------|-------------------------------------------------------------------------------------------|----------------------------------------------------------------------------------------------|
| Sex ratio (M/F)                                                   | 1.8 (251/142)                                                                             | 1.6 (390/241)                                                                                |
| Age (years, mean $\pm$ SEM)                                       | 59 $\pm$ 1                                                                                | 58 $\pm$ 1                                                                                   |
| Type of organ transplant, n (%)                                   |                                                                                           |                                                                                              |
| - Kidney                                                          | 288 (73)                                                                                  | 474 (75)                                                                                     |
| - Liver                                                           | 65 (17)                                                                                   | 104 (16)                                                                                     |
| - Thoracic organs                                                 | 35 (9)                                                                                    | 47 (7)                                                                                       |
| - Pancreas                                                        | 5 (1)                                                                                     | 6 (1)                                                                                        |
| History of rejection in the year preceding vaccination, n (%)     | 5 (1)                                                                                     | 12 (2)                                                                                       |
| Time between vaccine and transplantation (months, mean $\pm$ SEM) | 110 $\pm$ 5                                                                               | 124 $\pm$ 4                                                                                  |
| No induction therapy, n (%)                                       | 142 (36)                                                                                  | 234 (37)                                                                                     |
| Induction therapy, n (%)                                          | 251 (64)                                                                                  | 397 (63)                                                                                     |
| - Anti-IL2 receptor                                               | 144 (57)                                                                                  | 228 (57)                                                                                     |
| - Thymoglobulin                                                   | 104 (41)                                                                                  | 164 (41)                                                                                     |
| - Others                                                          | 3 (1)                                                                                     | 5 (1)                                                                                        |
| Type of immunosuppressive regimen, n (%)                          |                                                                                           |                                                                                              |
| - Anti-calcineurins                                               | 331 (84)                                                                                  | 555 (88)                                                                                     |
| o Tacrolimus                                                      | 304 (92)                                                                                  | 511 (92)                                                                                     |
| o Ciclosporin A                                                   | 27 (8)                                                                                    | 44 (8)                                                                                       |
| - Antimetabolite                                                  | 277 (70)                                                                                  | 436 (69)                                                                                     |
| o Mycophenolic acid                                               | 270 (97)                                                                                  | 427 (98)                                                                                     |
| o Azathioprine                                                    | 7 (3)                                                                                     | 9 (2)                                                                                        |
| - mTOR inhibitors                                                 | 101 (26)                                                                                  | 159 (25)                                                                                     |
| - Steroids                                                        | 307 (78)                                                                                  | 501 (79)                                                                                     |
| - Belatacept                                                      | 41 (10)                                                                                   | 37 (6)                                                                                       |

Abbreviations: SOT, solid organ transplant; IL2, interleukin 2; mTOR, mammalian target of rapamycin.

**Supplementary Table 2:** Clinical and biological characteristics of solid organ transplant recipients according to immunosuppressive regimen.

|                                                                   | Immunosuppressive regimen                    |                                           |                      |
|-------------------------------------------------------------------|----------------------------------------------|-------------------------------------------|----------------------|
|                                                                   | Tacrolimus +<br>mycophenolic acid<br>(N=210) | Tacrolimus +<br>mTOR inhibitors<br>(N=66) | Belatacept<br>(N=41) |
| Sex ratio (M/F)                                                   | 1.6 (130/80)                                 | 2 (44/22)                                 | 3.6 (32/9)           |
| Age (years, mean $\pm$ SEM)                                       | 58 $\pm$ 1                                   | 56 $\pm$ 2                                | 63 $\pm$ 2           |
| Type of organ transplant, n (%)                                   |                                              |                                           |                      |
| - Kidney                                                          | 144 (69)                                     | 53 (80)                                   | 37 (90)              |
| - Liver                                                           | 39 (19)                                      | 3 (5)                                     | -                    |
| - Thoracic organs                                                 | 23 (11)                                      | 9 (14)                                    | 4 (10)               |
| - Pancreas                                                        | 4 (2)                                        | 1 (2)                                     | -                    |
| History of rejection in the year preceding vaccination, n (%)     | 3 (1)                                        | 1 (2)                                     | 2 (5)                |
| Time between vaccine and transplantation (months, mean $\pm$ SEM) | 102 $\pm$ 6                                  | 55 $\pm$ 6                                | 88 $\pm$ 12          |
| No induction therapy, n (%)                                       | 73 (35)                                      | 24 (36)                                   | 18 (44)              |
| Induction therapy, n (%)                                          | 137 (65)                                     | 42 (64)                                   | 23 (56)              |
| - Anti-IL2 receptor                                               | 78 (57)                                      | 19 (45)                                   | 17 (74)              |
| - Thymoglobulin                                                   | 56 (41)                                      | 23 (55)                                   | 6 (26)               |
| - Others                                                          | 3 (2)                                        | -                                         | -                    |
| Neutrophils count (/mm <sup>3</sup> , mean $\pm$ SEM)             | 5192 $\pm$ 143                               | 5007 $\pm$ 244                            | 5840 $\pm$ 532       |
| Lymphocytes count (/mm <sup>3</sup> , mean $\pm$ SEM)             | 1766 $\pm$ 99                                | 1472 $\pm$ 84                             | 1520 $\pm$ 141       |
| CD4+ T-cells count (/mm <sup>3</sup> , mean $\pm$ SEM)            | 502 $\pm$ 34                                 | 400 $\pm$ 37                              | 431 $\pm$ 51         |
| CD8+ T-cells count (/mm <sup>3</sup> , mean $\pm$ SEM)            | 442 $\pm$ 42                                 | 360 $\pm$ 35                              | 496 $\pm$ 72         |
| CD19+ cells count (/mm <sup>3</sup> , mean $\pm$ SEM)             | 104 $\pm$ 12                                 | 72 $\pm$ 12                               | 106 $\pm$ 35         |
| NK cells count (/mm <sup>3</sup> , mean $\pm$ SEM)                | 214 $\pm$ 15                                 | 247 $\pm$ 23                              | 271 $\pm$ 39         |
| eGFR (mL/min/1.73m <sup>2</sup> ) at baseline                     |                                              |                                           |                      |
| - Kidney transplant eGFR                                          | 57 $\pm$ 2                                   | 52 $\pm$ 3                                | 48 $\pm$ 5           |
| - Non-kidney transplant eGFR                                      | 61 $\pm$ 3                                   | 58 $\pm$ 7                                | 62 $\pm$ 16          |
| Anti-SARS-CoV2 antibodies positivity, % (n)                       | 27 (56/210)                                  | 47 (31/66)                                | 15 (6/41)            |

Abbreviations: IL2, interleukin 2; mTOR, mammalian target of rapamycin; NK, natural killer; eGFR, estimated Glomerular Filtration Rate (Chronic Kidney Disease Epidemiology Collaboration (CKD-EPI) equation); COVID, coronavirus disease.
